# Supplementary material for: Alkaline-earth (Be, Mg and Ca) bonds at the origin of huge acidity enhancements
Source: Royal Society of Chemistry journal article supplement (doi:10.1039/c7cp07891a), 2017-12-19
Supplement: c7cp07891a1.pdf [file c7cp07891a1.pdf]

**Alkaline-earth (Be, Mg, Ca) bonds at the origin of huge acidity enhancements.**

M. Merced Montero-Campillo, Pablo Sanz, Otilia Mó, Manuel Yáñez,\* Ibon Alkorta\*  
and José Elguero.

Contribution from Departamento de Química, Facultad de Ciencias, Módulo 13, and  
Institute of Advanced Chemical Sciences (IadChem), Universidad Autónoma de Madrid.  
Campus de Excelencia UAM-CSIC, Cantoblanco, 28049-Madrid. Spai,  
and Instituto de Química Médica, CSIC, Juan de la Cierva, 3, 28006 Madrid. Spain

**SUPPORTING INFORMATION**

**(2 pages)**

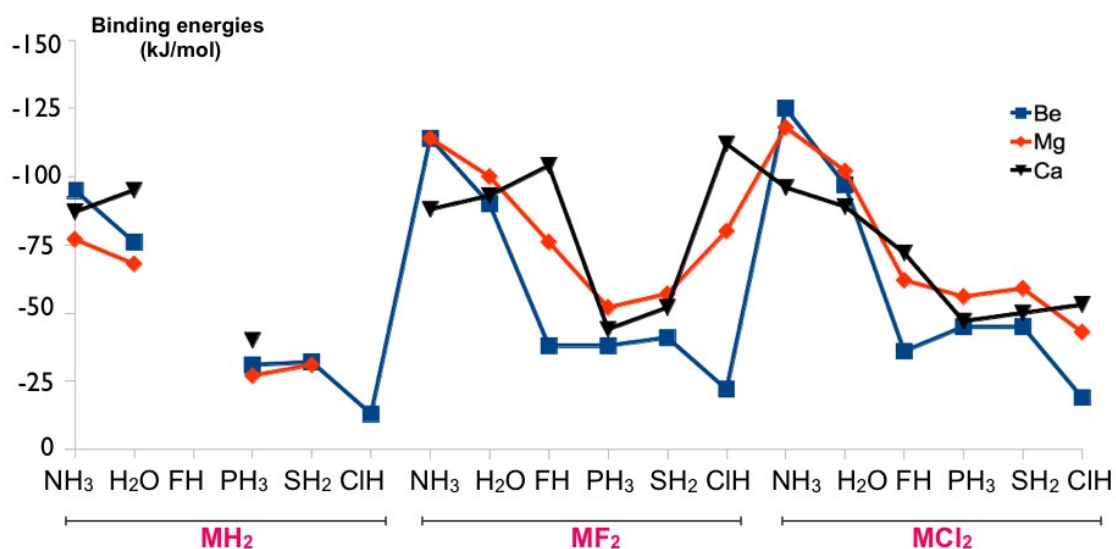

**Figure S1.** G4 Dissociation energies ( $D_0$ , kJ/mol) of the complexes formed by association of  $MH_2$ ,  $MF_2$  and  $MCl_2$  ( $M = Be, Mg, Ca$ ) with different Lewis bases.

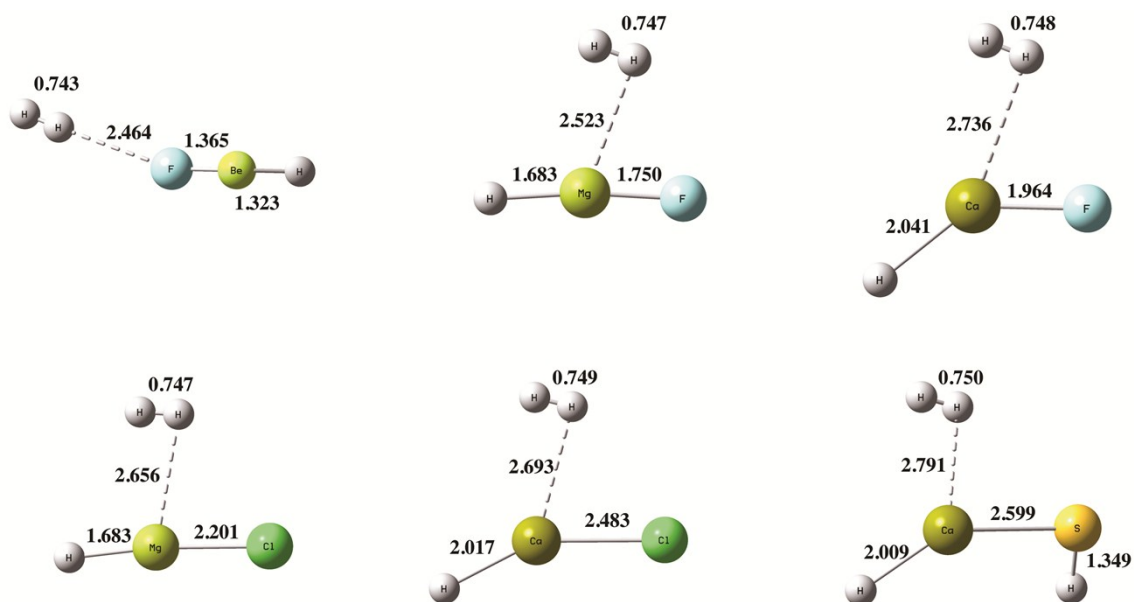

**Figure S2.** Equilibrium structures of the complexes formed upon the interaction of  $MH_2$  ( $M = Be, Mg, Ca$ ) with  $FH$  (first row);  $MH_2$  ( $M = Mg, Ca$ ) with  $HCl$  and  $CaH_2$  with  $SH_2$  (second row). In all cases, the spontaneous formation of a  $H_2$  molecule is observed. Bond distances are in Å
